# Supplementary material
Source: HighWire-hosted journal article supplement (https://jnm.snmjournals.org/highwire/filestream/99059/field_highwire_adjunct_files/0/237735_Supplemental_Data.pdf)
Supplement: 237735_Supplemental_Data.pdf [file 237735_Supplemental_Data.pdf]

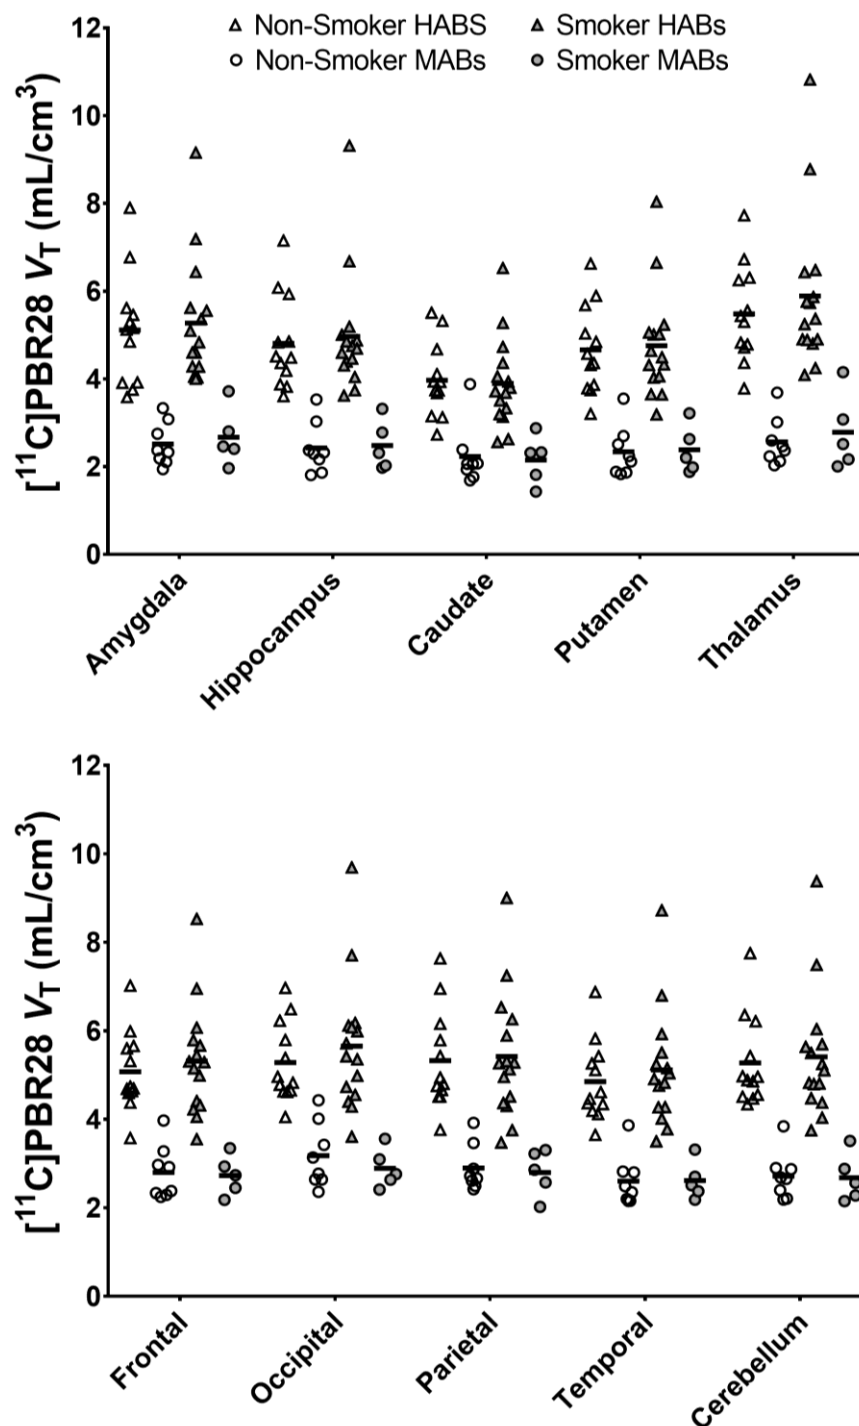

**Supplemental Fig 1:**  $[^{11}\text{C}]\text{PBR28 } V_T$  values are not significantly different between smokers ( $n=20$ , shaded triangles) and non-smokers ( $n=20$ , open circles). For completeness, uncorrected  $[^{11}\text{C}]\text{PBR28 } V_T$  values are shown, separately indicating HABS ( $\Delta$ ) and MABs (O). Top row shows subcortical brain regions; bottom row shows regions of cortex and cerebellum.

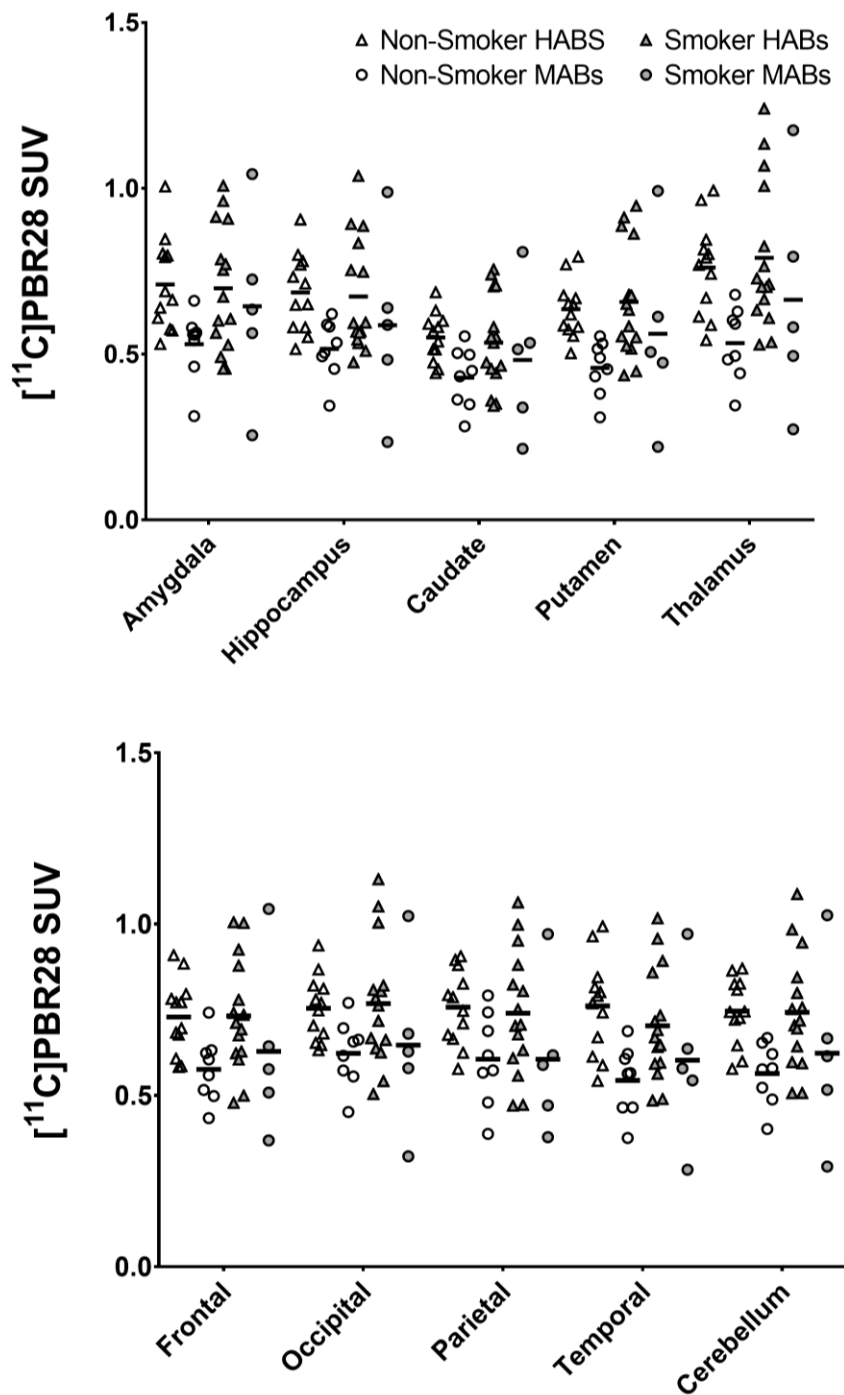

**Supplemental Fig 2:**  $[^{11}\text{C}]\text{PBR28}$  SUV values are not significantly different between smokers ( $n=20$ , shaded triangles) and non-smokers ( $n=20$ , open circles). uncorrected  $[^{11}\text{C}]\text{PBR28}$  SUV values (90-120 min) are shown, separately indicating HABS ( $\Delta$ ) and MABs (O). Top row shows subcortical brain regions; bottom row shows regions of cortex and cerebellum.
